# Supplementary material
Source: HighWire-hosted journal article supplement (http://jpet.aspetjournals.org/highwire/filestream/136660/field_highwire_adjunct_files/0/229641_suppl_figure.pdf)
Supplement: 229641_suppl_figure.pdf [file 229641_suppl_figure.pdf]

# ROFLUMILAST INCREASES BACTERIAL LOAD AND DISSEMINATION IN A MODEL OF *PSEUDOMONAS AERUGINOSA* AIRWAY INFECTION

Gopinath Kasetty\*, Praveen Papareddy, Ravi K.V. Bhongir, Arne Egesten.

Journal of Pharmacology and Experimental Therapeutics

## Suppl. Figure 1

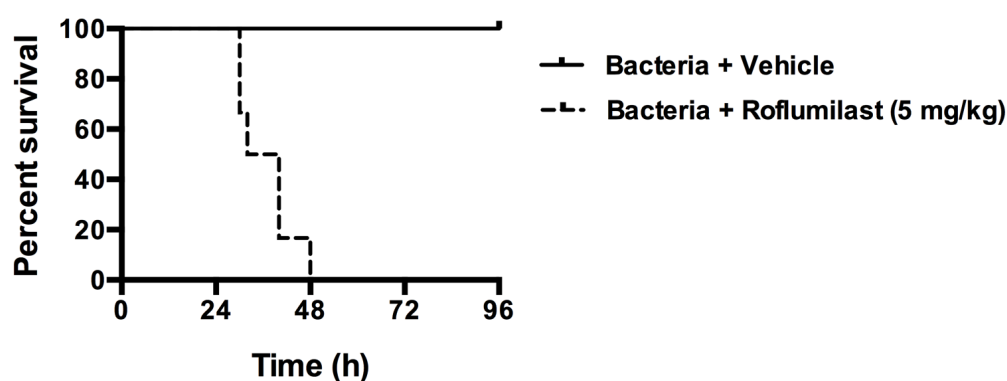

### Supplemental Figure 1. Continuous roflumilast treatment impairs survival in *P. aeruginosa* airway infection.

The survival of vehicle-treated and roflumilast-treated mice infected with bacteria (*P. aeruginosa*, strain Xen 41) was monitored for 7 days (only the course during the first 96 hours is shown in the figure). The treatment was continuous oral doses of roflumilast (5 mg/kg) or vehicle alone, administered 24 hours and 2 hours before infection and 24 hours post infection. At the time of infection, mice were subject to intranasal challenge with 50  $\mu$ l of PBS containing  $2 \times 10^8$  cfu/ml bacteria (five animals in each group).
